# Supplementary material for: Japanese value set for the Functional Assessment of Cancer Therapy Eight Dimension (FACT-8D) cancer-specific preference-based quality of life instrument
Source: Research Square preprint supplement (doi:10.21203/rs.3.rs-5909634/v1), 2025-04-16
Supplement: Supplementary file 9 [file dbac047bea6b3df95ede45f6.docx]

**Table 1:** Self-reported sociodemographic characteristics and health of the Japanese valuation survey (n=2320 participants who completed the 16 Discrete Choice Experiment choice sets) compared with the Japanese general population

| **Characteristics** | **Category** | | **Sample, n** | **Sample,**  **% or mean,** | **Japanese population, %** | **Test statistic**a | | ***p* value** | |
| --- | --- | --- | --- | --- | --- | --- | --- | --- | --- |
| **Sex**b | Male | | 1127 | 48.6% | 48.7 % | *X*2 = 0.01 | | .906 | |
|  | Female | | 1193 | 51.4% | 51.3 % |  | |  | |
| **Age**b | 18-29 years | | 299 | 12.9 % | 14.0% | *X*2 = 5.27 | | .383 | |
|  | 30-39 years | | 306 | 13.2 % | 13.3% |  | |  | |
|  | 40-49 years | | 377 | 16.3 % | 17.2% |  | |  | |
|  | 50-59 years | | 363 | 15.6 % | 15.1% |  | |  | |
|  | 60-69 years | | 363 | 15.6 % | 15.1% |  | |  | |
|  | 70 years or older | | 612 | 26.4 % | 25.3% |  | |  | |
| **Region**b | Hokkaido | | 82 | 3.6% | 4.2% | *X*2 = 166.22 | | < .001 | |
|  | Tohoku | | 89 | 3.9% | 7.0% |  | |  | |
|  | Kanto | | 998 | 43.4% | 34.2% |  | |  | |
|  | Chubu | | 319 | 13.8% | 16.8% |  | |  | |
|  | Kansai | | 489 | 21.1% | 17.7% |  | |  | |
|  | Chugoku | | 107 | 4.6% | 5.8% |  | |  | |
|  | Shikoku | | 51 | 2.2% | 3.0% |  | |  | |
|  | Kyushu | | 164 | 7.1% | 11.4% |  | |  | |
|  | Missing | | 21 | - | - |  | |  | |
| **Work type**e | Engaged mainly in work | | 1093 | 47.7% | 49.8% | *X*2 = 293.05 | | < .001 | |
|  | Engaged in work while attending school/housekeeping | | 283 | 12.3% | 9.2% |  | |  | |
|  | Not at work | | 51 | 2.2% | 1.6% |  | |  | |
|  | Unemployed person | | 44 | 1.9% | 1.5% |  | |  | |
|  | Attending school | | 34 | 1.5% | 5.4% |  | |  | |
|  | Housekeeping | | 415 | 18.1% | 12.0% |  | |  | |
|  | Other | | 372 | 16.2% | 20.5% |  | |  | |
|  | Missing | | 28 | - | - |  | |  | |
| **Paid employmentc** | Full time worker | | 746 | 54.2% | 52.5% | *X*2 = 70.22 | | < .001 | |
|  | Part-time worker | | 249 | 18.1% | 22.8% |  | |  | |
|  | Temporary worker | | 112 | 8.1% | 8.3% |  | |  | |
|  | Director/Self-employer | | 165 | 12.0% | 12.8% |  | |  | |
|  | Other | | 104 | 7.6% | 3.7% |  | |  | |
| **Household incomed** | < JPY 1million | | 169 | 6.8% | 6.4% | *X*2 = 618.11 | | < .001 | |
|  | JPY 1 million <= <JPY 2 million | | 155 | 8.7% | 12.6% |  | |  | |
|  | JPY 2 million <= <JPY 3 million | | 198 | 12.0% | 13.6% |  | |  | |
|  | JPY 3 million <= <JPY 4 million | | 275 | 15.8% | 12.8% |  | |  | |
|  | JPY 4 million <= <JPY 5 million | | 362 | 14.1% | 10.5% |  | |  | |
|  | JPY 5 million <= <JPY 7 million | | 322 | 15.8% | 16.7% |  | |  | |
|  | JPY 7 million <= <JPY 10 million | | 361 | 15.5% | 15.2% |  | |  | |
|  | JPY 10 million <= <JPY 15 million | | 355 | 7.8% | 8.8% |  | |  | |
|  | JPY 15 million <= <JPY 20 million | | 179 | 1.8% | 2.1% |  | |  | |
|  | JPY 20 million < | | 42 | 1.7% | 1.2% |  | |  | |
|  | Missing | | 40 | - | - |  | |  | |
| **Educatione** | Elementary or Junior high school | | 42 | 1.8% | 14.8% | *X*2 = 1022.21 | | < .001 | |
|  | High school | | 640 | 28.1% | 39.7% |  | |  | |
|  | College | | 426 | 18.7% | 20.5% |  | |  | |
|  | University or graduate | | 1168 | 51.3% | 24.3% |  | |  | |
|  | Missing | | 44 | - | - |  | |  | |
| **Relationship statusf** | Unmarried | | 734 | 32.6% | 31.6% | *X*2 = 63.42 | | < .001 | |
|  | Married | | 1266 | 56.2% | 61.3% |  | |  | |
|  | Bereaved | | 106 | 4.7% | 3.2% |  | |  | |
|  | Divorced | | 145 | 6.4% | 3.9% |  |  | | |
|  | Missing | | 69 | - | - |  |
| **Kessler psychological distress scale (K6)g** | 0-4 | | 1853 | 82.6% | 71.0% | *X*2 =148.61 | < .001 | |
|  | 5-9 | | 245 | 10.9% | 18.7% |  |
|  | 10-14 | | 101 | 4.5% | 7.2% |  |
|  | ≥15 | | 43 | 1.9% | 2.7% |  |
|  | Missing | | 78 | - | - |  |
| **EQ-5D-5L VASh** | Age | Gender |  |  |  |  |
|  | 20-29 | Male | 144 | 73.7 | = 82.6 | t = -5.33 | < .001 | |
|  | Female | 138 | 73.4 | = 81.2 | t = -5.09 | < .001 | |
|  | 30-39 | Male | 158 | 71.9 | = 79.3 | t = -4.75 | < .001 | |
|  | Female | 145 | 72.7 | = 79.4 | t =-4.09 | < .001 | |
|  | 40-49 | Male | 201 | 69.7 | = 78.8 | t =-6.43 | < .001 | |
|  | Female | 170 | 70.9 | = 80.1 | t = -5.42 | < .001 | |
|  | 50-59 | Male | 171 | 70.5 | = 77.0 | t = -4.56 | < .001 | |
|  | Female | 184 | 76.1 | = 79.2 | t = -2.27 | .025 | |
|  | 60-69 | Male | 172 | 71.7 | = 77.3 | t = -3.83 | < .001 | |
|  | Female | 173 | 76.3 | = 80.5 | t = -2.98 | .003 | |
|  | 70-79 | Male | 217 | 77.9 | = 74.9 | t = 2.96 | .003 | |
|  | Female | 301 | 78.8 | = 76.9 | t = 2.23 | .026 | |
|  | 80-89 | Male | 24 | 72.5 | = 70.3 | t = 0.52 | .609 | |
|  | Female | 34 | 72.1 | = 68.1 | t =1.20 | .238 | |
|  | Missing |  | 88 | - | - |  |
| **General Health Questioni** | Excellent [5] |  | 110 | 4.7% | - |  |
|  | Very good [4] |  | 429 | 18.5% | - |  |
|  | Good [3] |  | 754 | 32.5% | - |  |
|  | Fair [2] |  | 783 | 33.8% | - |  |
|  | Poor [1] |  | 244 | 10.5% | - |  |
| **Total sample** |  |  | **2320** |  |  |  |

*Note.*

a. For categorical variables, the Chi-Squared Goodness-of-Fit test was used to compare observed category frequencies with those expected based on population proportions. For continuous variables, t-test was used to compare sample means to population means.

b. 2019 Population statistics data from [https://www.e-stat.go.jp/stat-search/files?page=1&layout=datalist&toukei=00200524&tstat=000000090001&cycle=7&year=20190&month=0&tclass1=000001011679&result_back=1&tclass2val=0](about:blank)

c. Survey data (provided by n=1602 survey participants who endorsed one of these four categories) were compared to 2019 Population statistics data after adjusting the general population percentages to be proportional to the four categories for which we had data. The remainder were either not in paid employment or possibly missed this question. 2019 Labour force survey data from [https://www.e-stat.go.jp/stat-search/files?page=1&layout=datalist&toukei=00200531&tstat=000000110001&cycle=7&year=20190&month=0&tclass1=000001040276&tclass2=000001040283&tclass3=000001040284&result_back=1&tclass4val=0](about:blank)

d. 2018 Japanese “Comprehensive Survey of Living Conditions” data from [https://www.e-stat.go.jp/stat-search/files?page=1&layout=datalist&toukei=00450061&tstat=000001129675&cycle=7&tclass1=000001130605&tclass2val=0](about:blank)

e. 2017 Japanese employment status survey data from [https://www.e-stat.go.jp/stat-search/files?page=1&layout=datalist&toukei=00200532&tstat=000001107875&cycle=0&tclass1=000001107876&tclass2=000001107877&tclass3val=0](about:blank)

f. 2015 Japanese national census data from [https://www.e-stat.go.jp/stat-search/files?page=1&layout=datalist&toukei=00200521&tstat=000001080615&cycle=0&tclass1=000001089055&tclass2=000001089056&tclass3val=0](about:blank)

g. 2019 Japanese “Comprehensive Survey of Living Conditions” data from [https://www.e-stat.go.jp/stat-search/files?page=1&toukei=00450061&tstat=000001141126](about:blank). Low scores indicate low non-specific psychological distress.

h. Japanese Population Norms of EQ-5D-5L Visual Analogue Score (VAS) (Shiroiwa, Noto and Fukida, 2021).

i.No normative data available
